# Supplementary material for: How the frequency and amount of corporate donations affect consumer perception and behavioral responses
Source: Springer Nature journal article supplement (doi:10.1007/s11747-018-0584-7), 2018-06-04

- **Appendix A. Measurement Items Used in Studies**

|  | **Measurement scales** | **Reference/Note** |
| --- | --- | --- |
| **Pilot Study** |  |  |
| Perceived capability  (α = 0.82) | 1. *The firm has the capability to do public good* | Modified from Lee et al. (2013) |
| 2. *The firm has abundant resources to do public good* |
| 3. *The firm has a strong ability to do public good*  (1= Strongly disagree, 7 = Strongly agree) |
| Perceived commitment  (α = 0.88) | 1. *The firm expends considerable effort to do public good* | Modified from Lichtenstein et al. (2004) |
| 2. *The firm has a strong commitment to do public good* |
| 3. *The firm* *demonstrates* *persistence in doing public good*  (1= Strongly disagree, 7 = Strongly agree) |
| Perceived frequency of donations | *How frequently did the firm make donations?*  (1 = Not at all, 7 = Very frequently) | Manipulation check |
| Perceived amount of donations | *To what extent did the firm make a large-scale donation each time*?  (1 = Not at all, 7 = Very large amount) | Manipulation check |
| **Study 1** |  |  |
| Attitudes toward firm  (α = 0.82) | 1. *How good is your first impression of this firm?*  (1= Very bad, 7 = Very good) | Moore et al. (1995) |
| 2. *How much do you like this firm?* (1= Not at all, 7 = Very much) |
| Purchase intentions | *How likely are you to buy products from this donating firm?*  (1= Not at all, 7 = Very much) | Putrevu & Lord (1994) |
| Perceived instrumentality | *To what extent do you think the donations would be instrumental and helpful to achieve the charitable goal?*  (1 = Not at all, 7 = Very helpful) | Simons et al. (2000) |
| Perceived type of the charitable goal | *What charitable goal do you think the firm’s donations intend to support?*  (1*=preventing worse outcomes, 7 = promoting better outcomes)* | Manipulation check |
| **Study 2** |  |  |
| Perceived instrumentality (α=0.88) | 1. *How valuable do you think the firms’ donation is for the ACHC?* | Modified from Simons et al. (2000) |
| 2. *How helpful do you think the firm’s donation is for the ACHC?* |
| 3. *To what extent is the firm’s donation instrumental for the ACHC?*  (1= Not at all, 7 = Very much). |

**References**

Lee, E. M., Park, S. Y., & Lee, H. J. (2013). Employee perception of CSR activities: Its antecedents and consequences. *Journal of Business Research*, *66*(10), 1716-1724.

Lichtenstein, D. R., Drumwright, M. E., & Braig, B. M. (2004). The effect of corporate social responsibility on customer donations to corporate-supported nonprofits. *Journal of Marketing*, *68*(4), 16-32.

Moore, D. J., Harris, W. D., & Chen, H. C. (1995). Affect intensity: An individual difference response to advertising appeals. *Journal of Consumer Research*, *22*(2), 154-164.

Putrevu, S., & Lord, K. R. (1994). Comparative and noncomparative advertising: Attitudinal effects under cognitive and affective involvement conditions. *Journal of Advertising*, *23*(2), 77-91.

Simons, J., Dewitte, S., & Lens, W. (2000). Wanting to have vs. wanting to be: The effect of perceived instrumentality on goal orientation. *British Journal of Psychology*, *91*(3), 335-351

- **Appendix B. Experimental Materials**

**Study 1.**

a). Amount-focused donation strategy + Approach-oriented charitable goal condition

| **NEWS #2**  Electronic firm TP donates to [Local Education Foundations](http://nfpe.org/aboutus/lef/)  (Published January 27, 2016 Business news weekly) 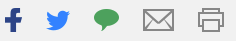  The electronic firm TP announced on Wednesday that it donated **a lump sum of forty million dollars** to [Local Education Foundations (LEF)](http://nfpe.org/aboutus/lef/)last year.  According to the news release issued by TP’s CSR Department, the donated money would mainly be used as an educational fund to help improve educational quality, enhance educational facilities and promote a better educational environment for the local community.  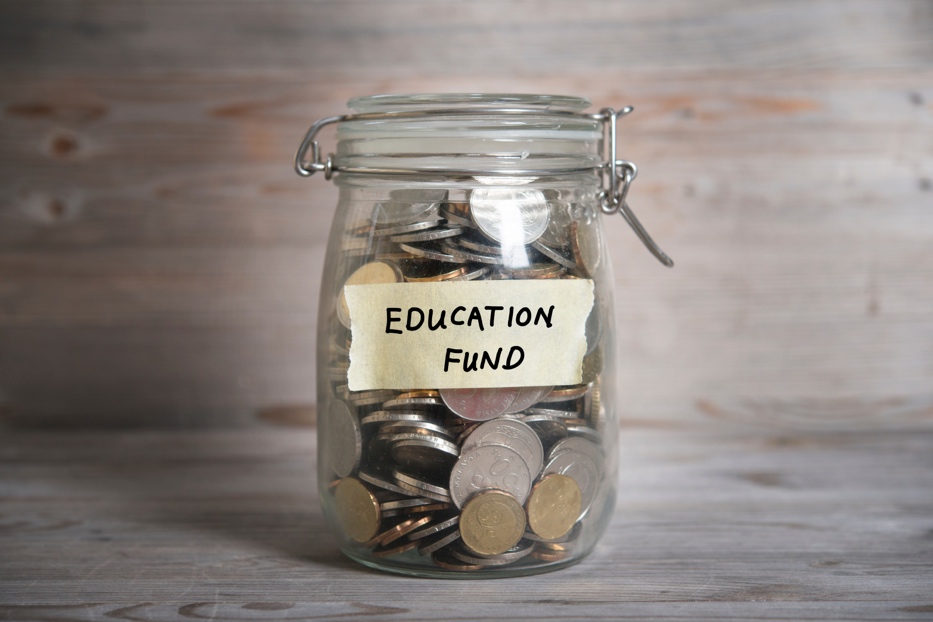  "We care about our students and are very grateful for the donation!", the CEO of LEF Wendy Clark, said. |
| --- |

b). Frequency-focused donation strategy + Avoidance-oriented charitable goal condition

| **NEWS #2**  Electronic firm TP donates to [Local Education Foundations](http://nfpe.org/aboutus/lef/)  (Published January 27, 2016 Business news weekly) 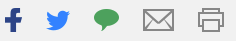  The electronic firm TP announced on Wednesday that it **consistently donated two million dollars on twenty occasions** to the [Local Education Foundations (LEF)](http://nfpe.org/aboutus/lef/)last year.  According to the news release issued by TP’s CSR Department, the donated money would mainly be used as an educational fund to help stop the decline in educational quality, avoid a lack of educational facilities and prevent a worse educational environment for the local community.  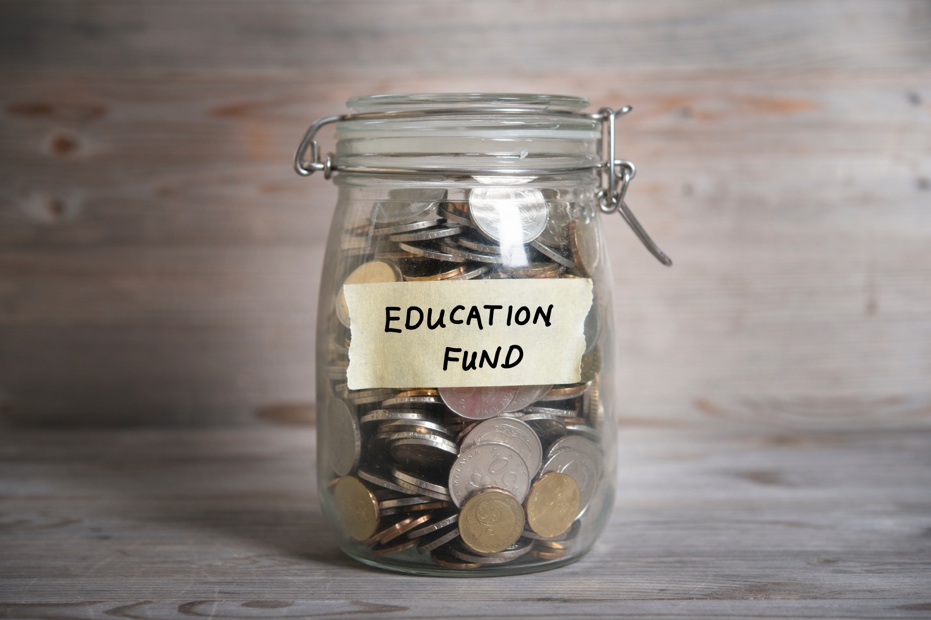  "We care about our students and are very grateful for the donation!", the CEO of LEF, Wendy Clark, said. |
| --- |

**Study 2.**

a). Frequency-focused donation strategy + Approach-oriented charitable goal condition


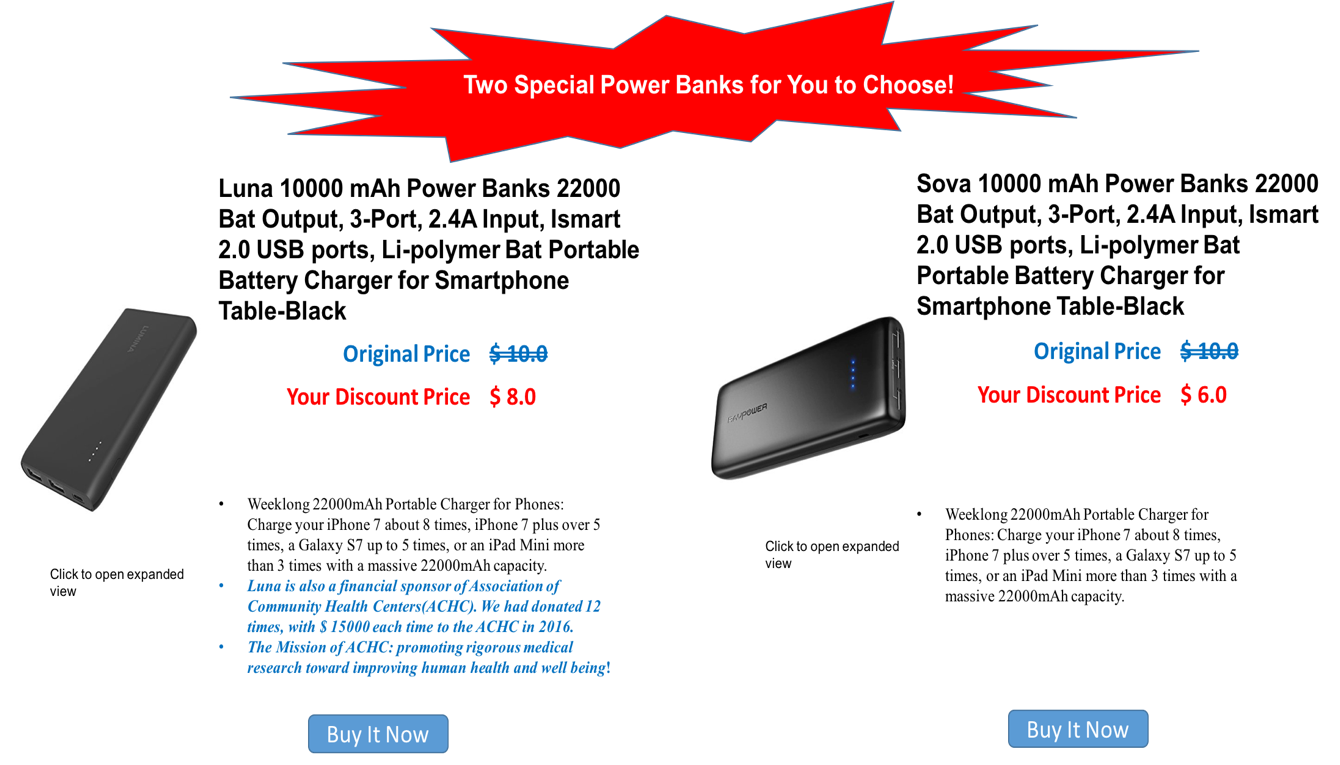


b). Amount-focused donation strategy + Avoidance-oriented charitable goal condition


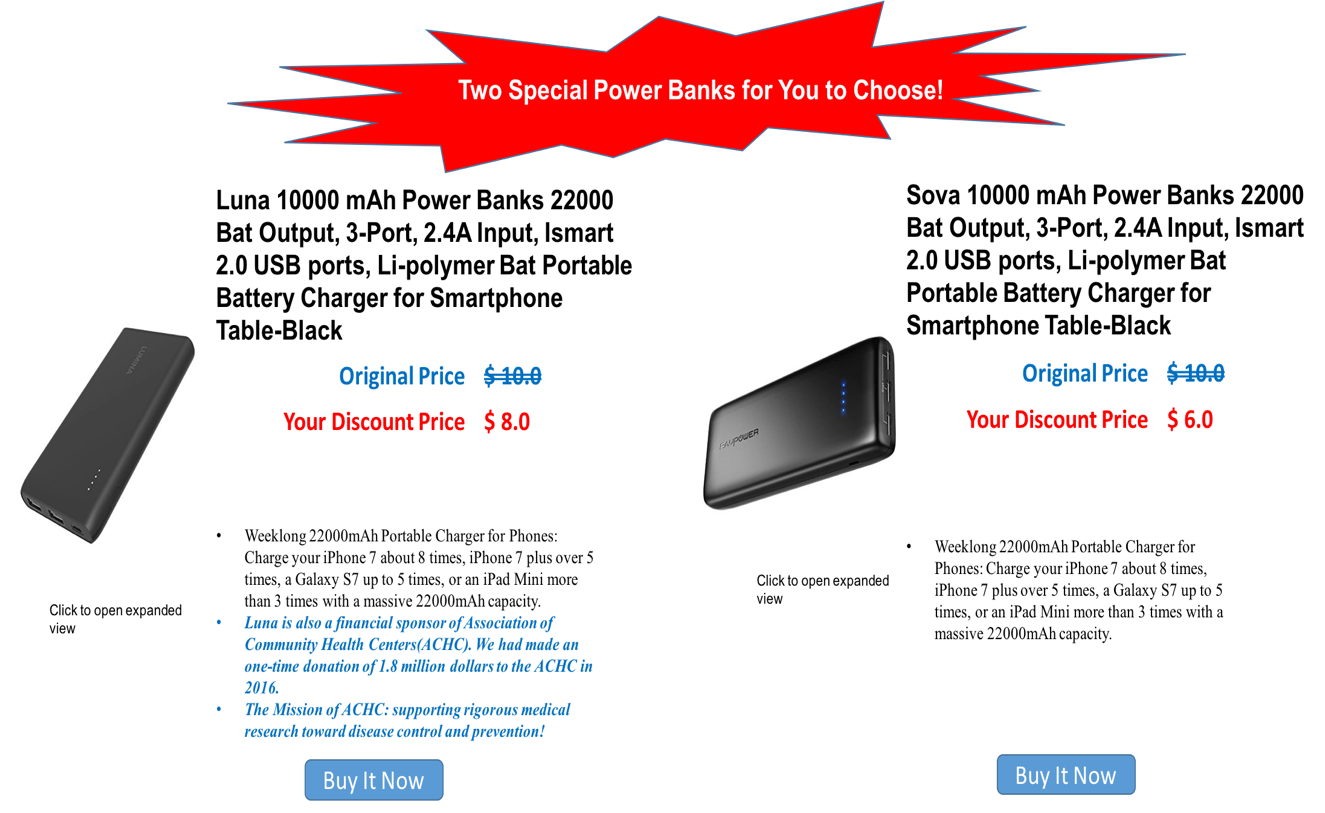


*The targeted brand is Luna.

**Study 3.**

a). Frequency-focused donation strategy + Approach-oriented charitable goal condition


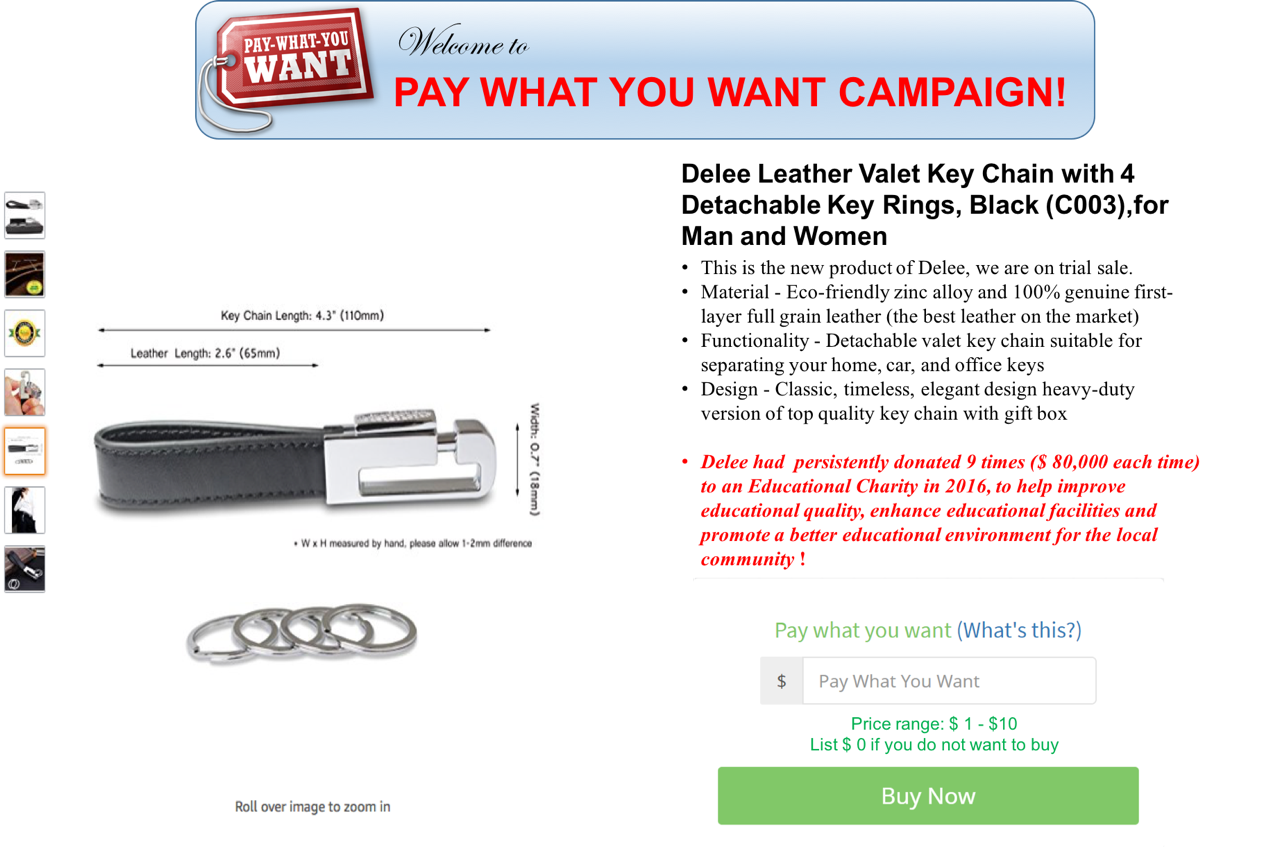


b). Amount-focused donation strategy + Avoidance-oriented charitable goal condition


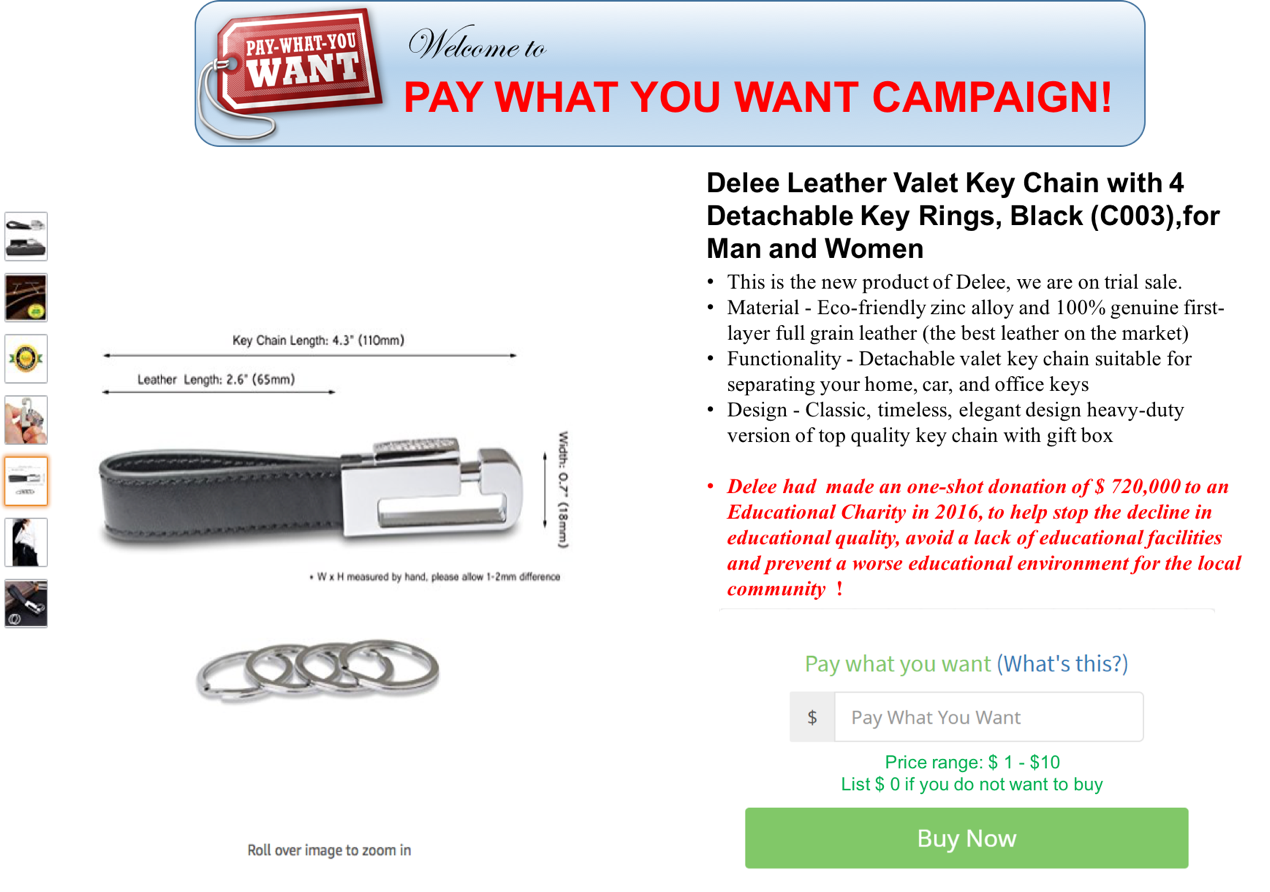

Supplement: MOESM1 [file 15818550]
